# Supplementary material for: Physiotherapeutic Protocol and ZnO Nanoparticles: A Combined Novel Treatment Program against Bacterial Pyomyositis
Source: MDPI journal article supplement (doi:10.3390/biology11101393), 2022-09-23
Supplement: s1 [file s1]

Supplementary Material

# Physiotherapeutic Protocol and ZnO Nanoparticles: A Combined Novel Treatment Program against Bacterial Pyomyositis

Hesham El-Shaer, Bassma H. Elwakil, Basant A. Bakr, Ahmed M. Eldrieny, Mostafa El-Khatib, KhimPhin Chong and Amr A. Abo Gazia

Table S1. Hematological parameters of the experimental rat groups.

| Hematological Parameters | Positive control |            |            |            | ZnO treatment |            |            |            |
|--------------------------|------------------|------------|------------|------------|---------------|------------|------------|------------|
|                          | Week 1           | Week 2     | Week 3     | Week 4     | Week 1        | Week 2     | Week 3     | Week 4     |
| WBCs                     | 8100±623.1       | 7500±535.7 | 7900±493.8 | 7700±481.3 | 5700±356.3    | 7800±487.5 | 8500±607.1 | 8700±621.4 |
| Eosinophile              | 4±0.40           | 3±0.38     | 1±0.13     | 3±0.38     | 2±0.18        | 2±0.17     | 3±0.30     | 2±0.29     |
| Neutrophile              | 30±3.00          | 38±3.80    | 38±4.22    | 38±2.92    | 35±2.92       | 40±3.33    | 40±4.00    | 33±3.67    |
| Lymphocyte               | 61±4.69          | 56±4.31    | 37±2.85    | 55±3.93    | 60±6.00       | 55±4.23    | 57±4.75    | 62±6.20    |
| Monocyte                 | 5±0.50           | 3±0.30     | 2±0.18     | 4±0.40     | 3±0.33        | 3±0.33     | 4±0.40     | 3±0.33     |

Table S2. Biochemical parameters of the experimental rat groups.

| Biochemical Parameters | Positive control |          |          |          | ZnO treatment |           |           |            |
|------------------------|------------------|----------|----------|----------|---------------|-----------|-----------|------------|
|                        | Week 1           | Week 2   | Week 3   | Week 4   | Week 1        | Week 2    | Week 3    | Week 4     |
| LDH mg/dL              | 686±42.9         | 753±50.2 | 301±18.8 | 271±15.9 | 688±40.5      | 937±72.1  | 646±46.1  | 963±64.2   |
| Albumin g/dL           | 3.7±0.34         | 2.5±0.23 | 3±0.30   | 4.3±0.48 | 4.3±0.43      | 3.3±0.37  | 4.1±0.34  | 4.3±0.43   |
| CK mg/dL               | 791±60.8         | 191±12.7 | 716±47.7 | 472±33.7 | 1904±146.5    | 1330±88.7 | 1280±85.3 | 1924±128.3 |
| ALT U/L                | 65±5.9           | 140±9.3  | 91±5.7   | 54±3.9   | 152±10.1      | 274±18.3  | 73±5.2    | 70±5.4     |
| AST U/L                | 108±7.2          | 185±10.9 | 112±10.2 | 69±4.3   | 109±6.4       | 205±12.1  | 167±13.9  | 133±11.1   |
| ALP U/L                | 317±24.4         | 427±28.5 | 266±24.2 | 236±21.5 | 341±31.0      | 528±31.1  | 253±16.9  | 303±20.2   |
